# Supplementary material for: ST6GALNAC1 plays important roles in enhancing cancer stem phenotypes of colorectal cancer via the Akt pathway
Source: PubMed Central journal article supplement (PMC5762531; doi:10.18632/oncotarget.22545), 2017-11-08
Supplement: oncotarget-08-112550-s001.pdf [file oncotarget-08-112550-s001.pdf]

# ST6GALNAC1 plays important roles in enhancing cancer stem phenotypes of colorectal cancer via the Akt pathway

## SUPPLEMENTARY MATERIALS

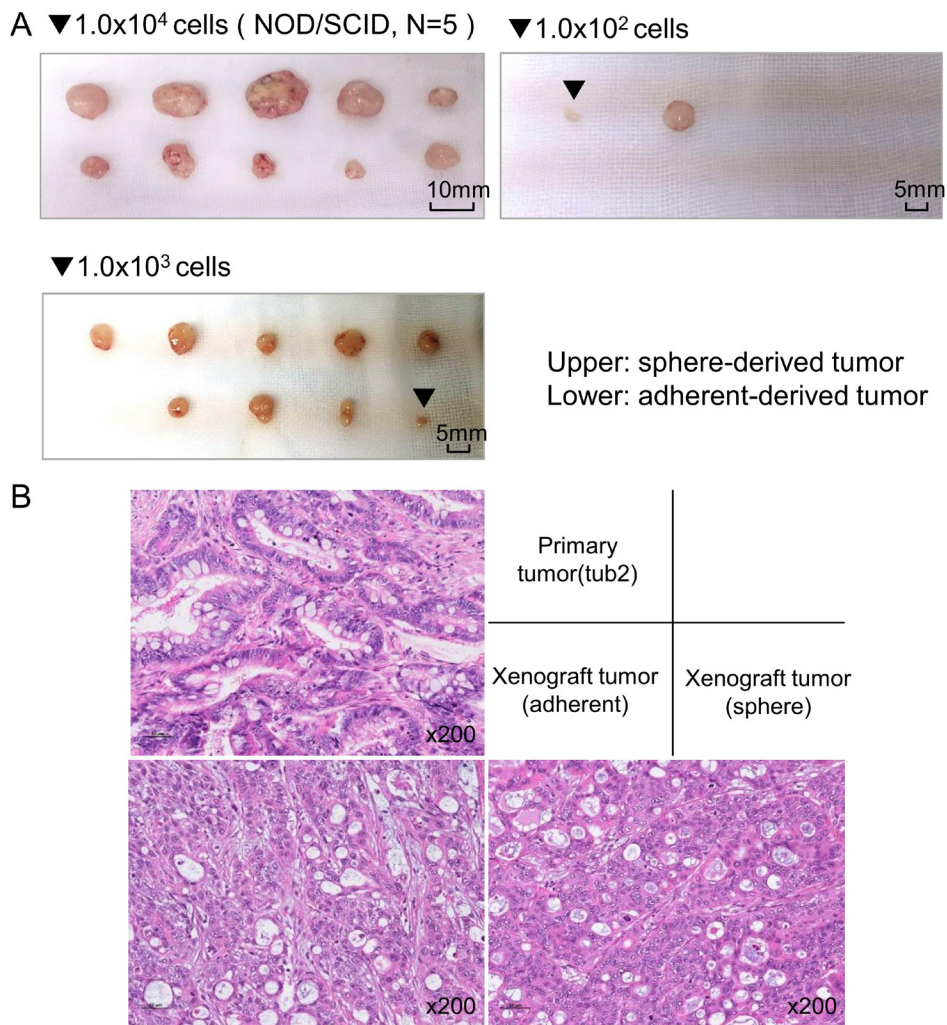

**Supplementary Figure 1: Characterization of human primary CR-CSCs/CICs (CRC21 cells).** (A) Xenografted tumors. Tumor imaged derived from xenografted mouse using  $1 \times 10^2$ ,  $1 \times 10^3$  and  $1 \times 10^4$  cells. Sphere-cultured CRC21 cells (upper) and adherent-cultured CRC21 cells (lower) were used. (B) Histologies of primary tumor and xenografted tumors (adherent-cultured and sphere-cultured cells). Tumors were stained by hematoxylin and eosin (HE). Magnification,  $\times 200$ .

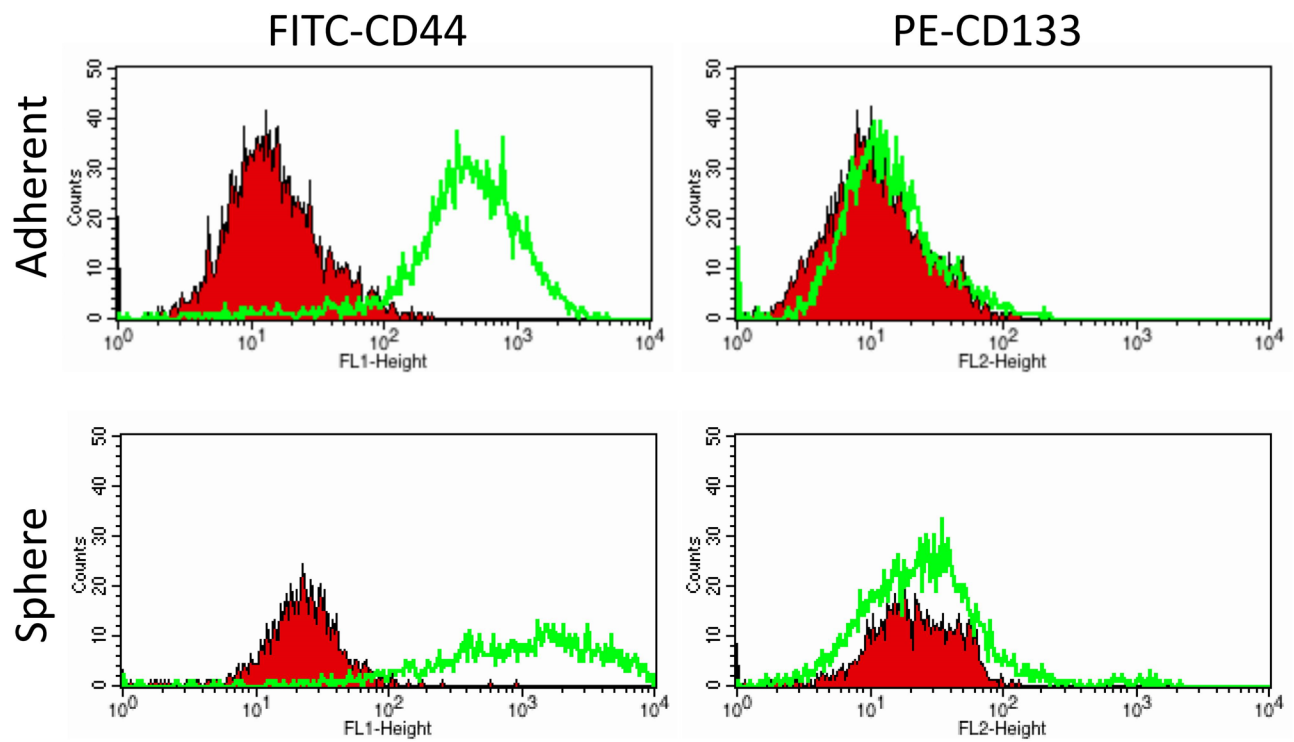

**Supplementary Figure 2: The expressions of CD44 and CD133 in sphere-cultured cells.** CRC21 cells were cultured in sphere-culture condition and adherent-condition for 7 days, then analyzed the expressions of CD44 and CD133 by flow cytometry. Red indicate negative controls and green indicate CD44 or CD133 stained sample.

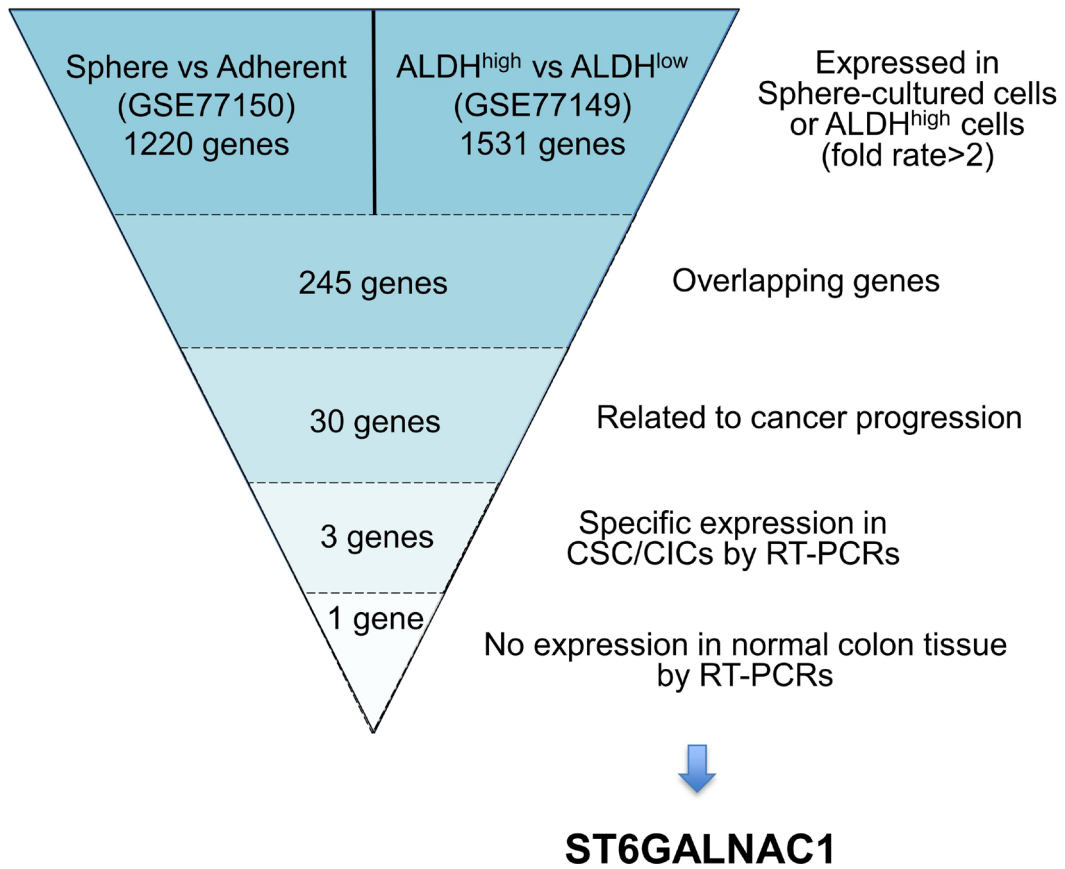

Supplementary Figure 3: Schematic summary of narrowing down CSC/CIC-specific genes by two microarray analysis.

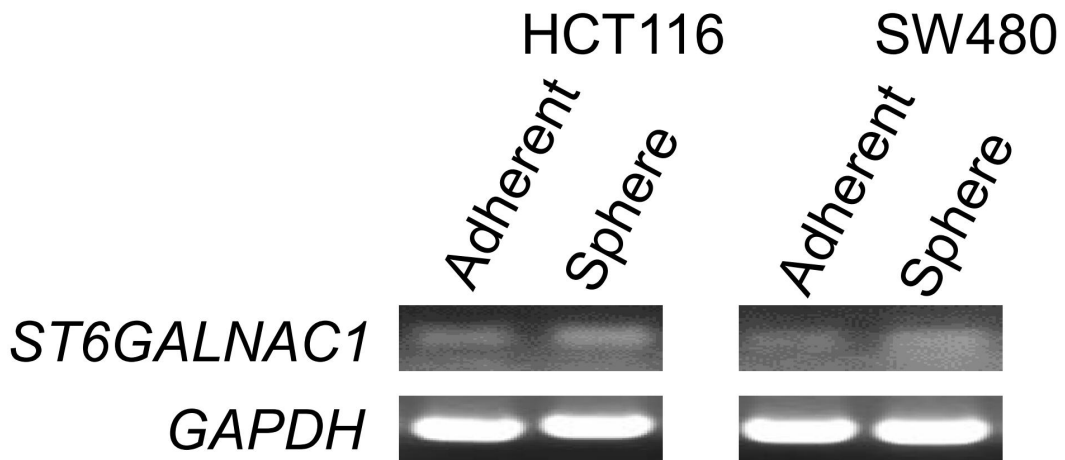

Supplementary Figure 4: Expression of *ST6GALNAC1* in sphere-cultured HCT116 cells and SW480 cells. RT-PCRs were performed using cDNAs derived from adherent-cultured and sphere-cultured HCT116 cells and SW480 cells. GAPDH was used an internal control.

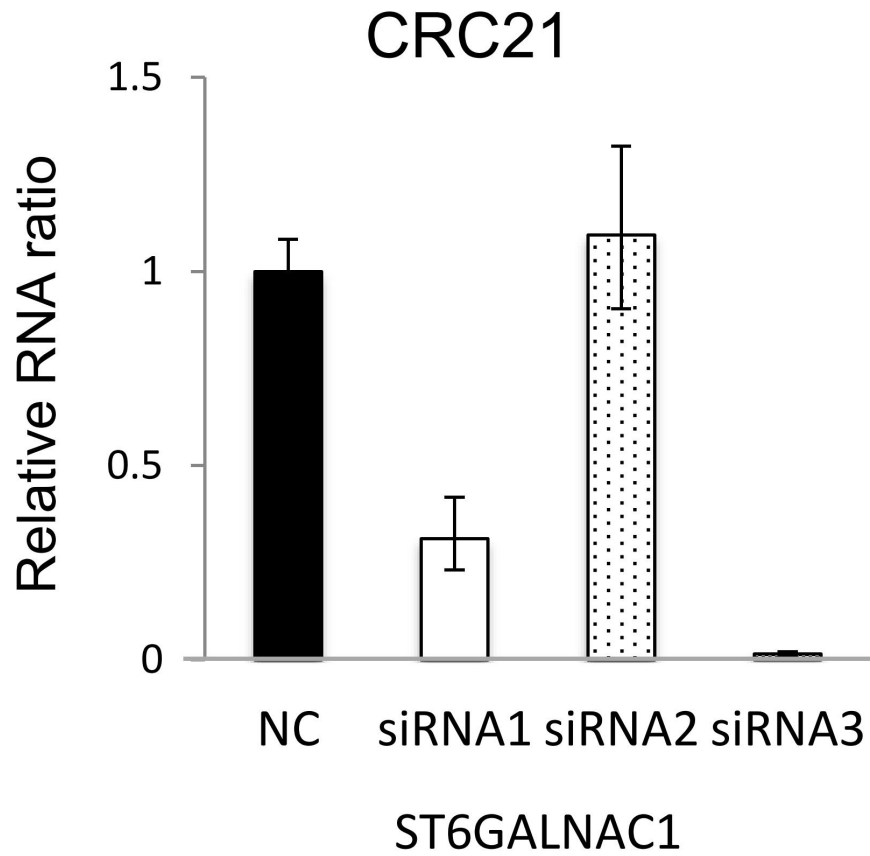

**Supplementary Figure 5: ST6GALNAC1 knockdown by siRNAs.** Three different siRNA and negative control siRNA were transfected into CRC21 cells and expression level of ST6GLNAC1 in each sample was analyzed using qRT-PCR. Data are shown as means  $\pm$  SD.

| Stem cell frequency of ST6GALNAC1 knocked down cells |                       |                |                 |                  |               |          |           |
|------------------------------------------------------|-----------------------|----------------|-----------------|------------------|---------------|----------|-----------|
| HCT116 cells                                         | sphere-positive wells |                |                 |                  | CSC frequency | 95% CI   | †P value  |
|                                                      | 1 cell /well          | 10 cells /well | 100 cells /well | 1000 cells /well |               |          |           |
| N/C                                                  | 0/24                  | 1/24           | 7/24            | 24/24            | 1 in 240      | 146-393  | -         |
| siRNA1                                               | 0/24                  | 0/24           | 3/24            | 20/24            | 1 in 603      | 388-939  | 0.00676*  |
| siRNA3                                               | 0/24                  | 0/24           | 0/24            | 19/24            | 1 in 803      | 507-1271 | 0.000484* |

†Difference with cells transfected with negative control siRNA were calculated by Chi-square test. \*P<0.05

**Supplementary Figure 6: Stem cell ratios in ST6GALNAC1-knockdown cells.** HCT116 cells transfected with siRNAs (control, ST6GALNAC1 siRNA1, ST6GALNAC1 siRNA3) were seeded into a 96-well plate at 1, 10, 100 and 1000 cells/well under a sphere-forming condition and cultured for 7 days. The sphere-positive wells were counted and are shown. Stem cell ratios in negative control cells and ST6GALNAC1-knockdown cells were calculated by the ELDA website.

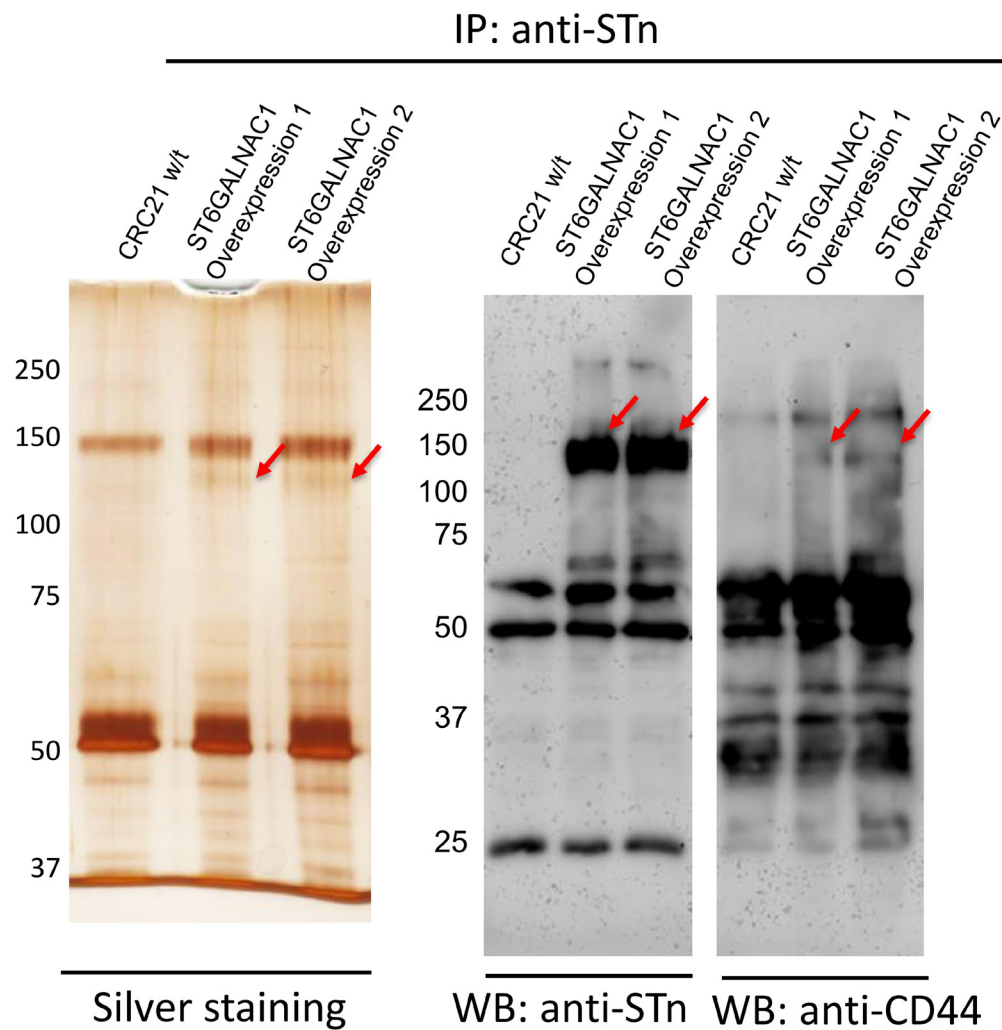

**Supplementary Figure 7: Analysis of STn antigen expressed in ST6GALNAC1 overexpressed cells.** ST6GALNAC1 gene was overexpressed in CRC21 cells (overexpression 1 and 2). The cell lysates of CRC21 w/t cells and ST6GALNAC1 overexpressed cells were immunoprecipitated using anti-STn antibody. The precipitates were analyzed by silver staining, and Western blotting using anti-STn antigen and anti-CD44 antibody. Numerical indicate molecular weights (kDa). Red arrows indicate ST6GALNAC1 specific bands.

AZD5363 treatment(3  $\mu$ M)  
Primary; sphere-cultured cells

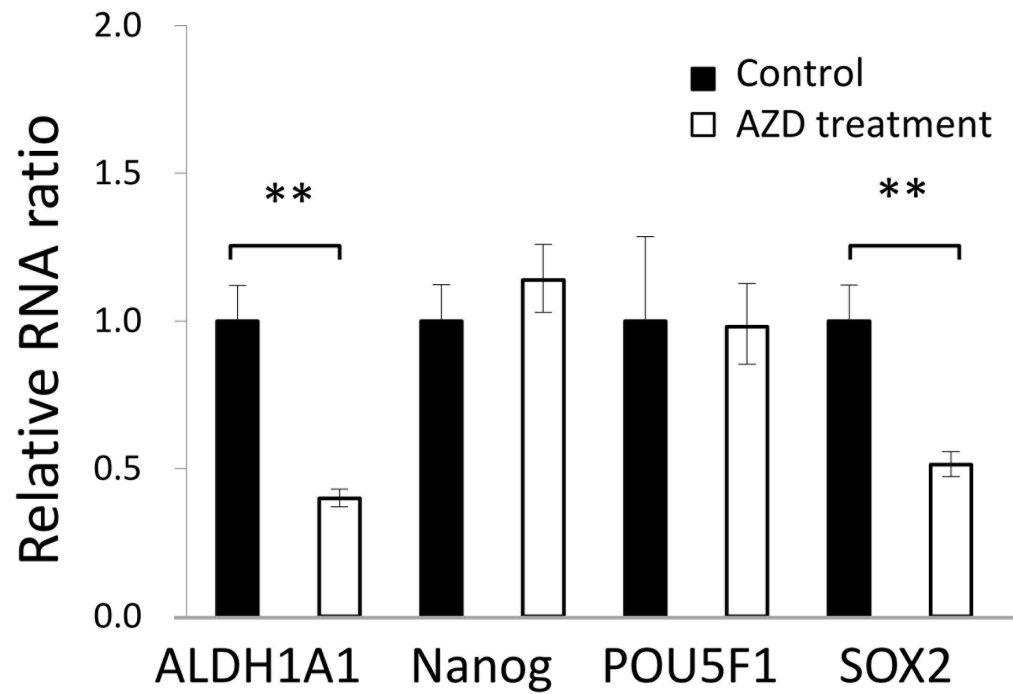

**Supplementary Figure 8: Inhibition of Akt inhibitor decreased the expressions of ALDH1A1 and SOX2.** Sphere-cultured cells were treated by an Akt inhibitor AZD5363 (3  $\mu$ M), then the expressions of stem cell related genes were analyzed by qRT-PCR. Data are shown as means  $\pm$  SD.

**Supplementary Table 1: Primer sequences for RT-PCR**

| <b>Gene Name</b> |         | <b>Primer sequence (5'→3')</b> | <b>Product size (bp)</b> |
|------------------|---------|--------------------------------|--------------------------|
| ALDH1A1          | forward | TGTTAGCTGATGCCGACTTG           | 153                      |
|                  | reverse | TTCTTAGCCCGCTCAACACT           |                          |
| Nanog            | forward | GCTGAGATGCCTCACACGGAG          | 163                      |
|                  | reverse | TCTGTTTCTTGACCGGGACCTTGTC      |                          |
| POU5F1           | forward | TGGAGAAGGAGAAGCTGGAGCAAAA      | 186                      |
|                  | reverse | GGCAGATGGTCGTTTGGCTGAATA       |                          |
| SOX2             | forward | CATGATGGAGACGGAGCTGA           | 420                      |
|                  | reverse | ACCCCGCTCGCCATGCTATT           |                          |
| ST6GALNAC1       | forward | TCTCCCTGACCCAGTCACTC           | 198                      |
|                  | reverse | CTTCCCGAAAAGCTTCCTG            |                          |
| LGALS3           | forward | TGGAGCACCTGGAGCTTATC           | 221                      |
|                  | reverse | CCGTGCCCAGAATTGTTATC           |                          |
| GAPDH            | forward | ACCACAGTCCATGCCATCAC           | 452                      |
|                  | reverse | TCCACCACCCTGTTGCTGTA           |                          |
